# Supplementary material
Source: PubMed Central journal article supplement (PMC3186335)

**Figure S1. Unsupervised cluster analysis of CD4<sup>+</sup> T<sub>H</sub> populations does not segregate FL samples based on diagnosis or previous treatment**

Principal component analysis of data set as described in Fig. 5 revealing either the FL patient diagnosis at time of biopsy (A) or previous treatment (B).

**Figure S2. Intracellular cytokine data does not cluster based on diagnosis or previous treatment**

TH1, TH2, TH17, and THpp cytokine data plotted based on diagnosis (A) or previous treatment (B).

Figure S1

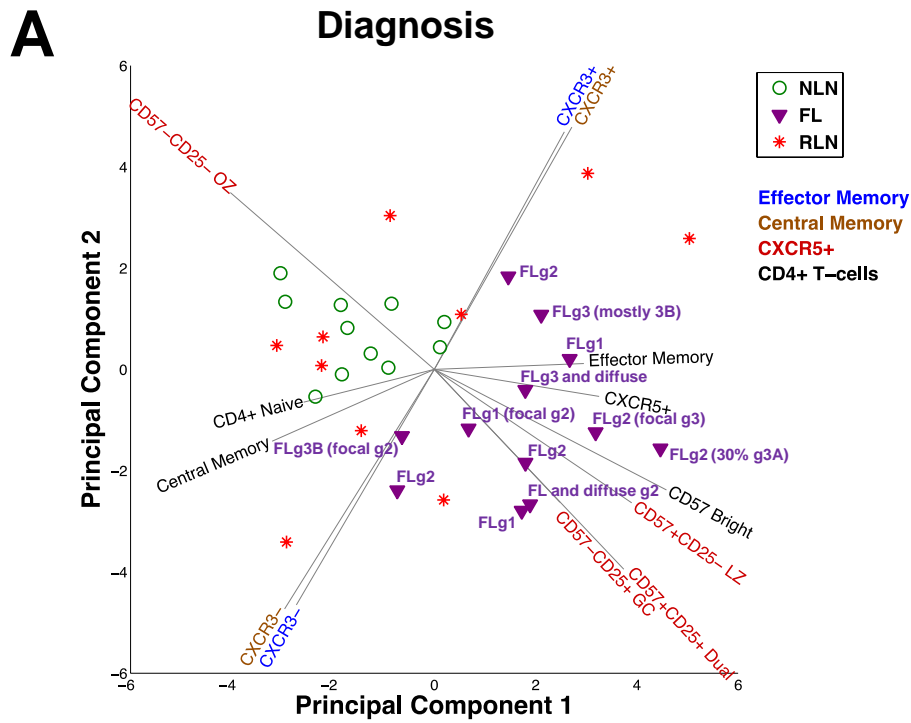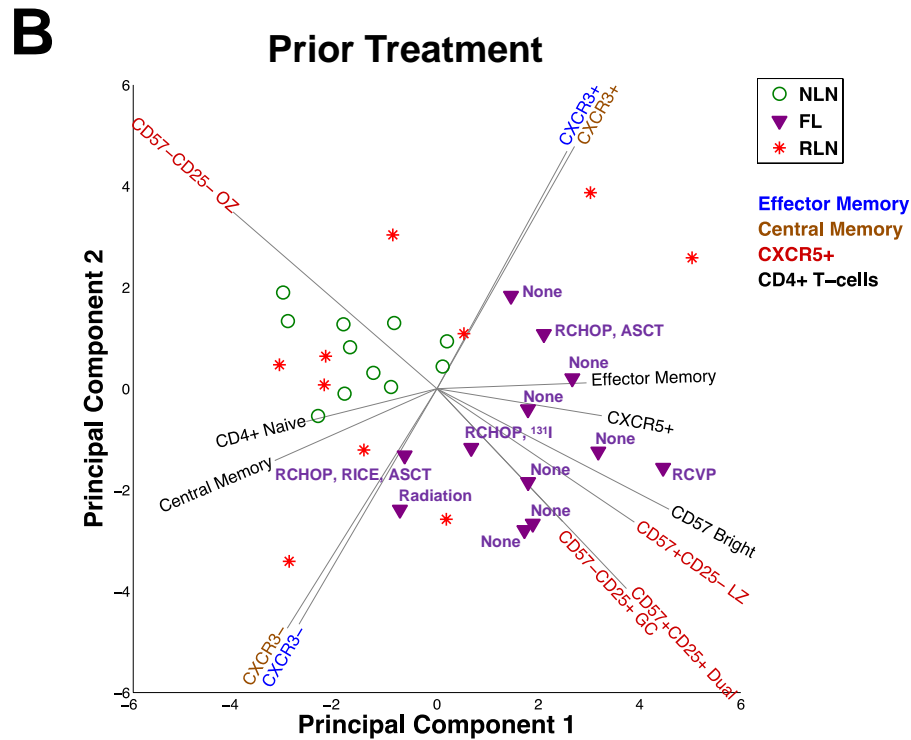

Figure S2

**A**

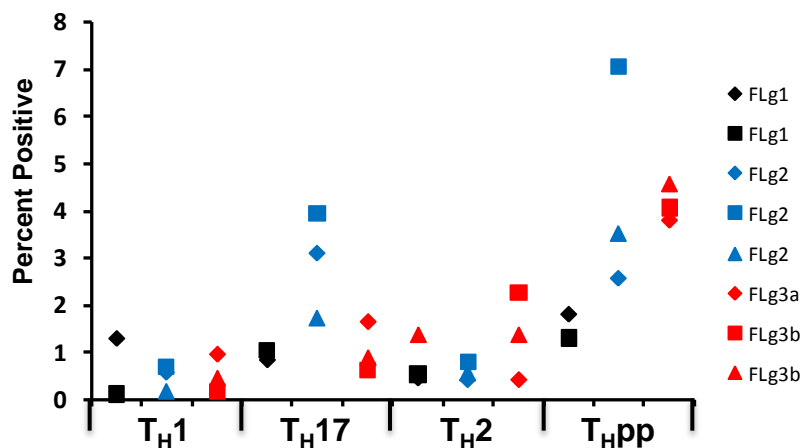

**B**

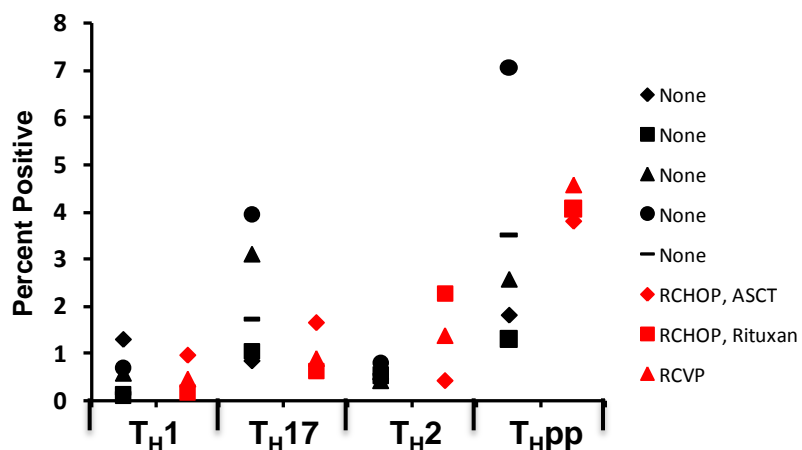

Supplement: supp_blood-2011-03-340646_Document1.pdf [file supp_blood-2011-03-340646_Document1.pdf]
